# Supplementary material
Source: PubMed Central journal article supplement (PMC3650326)

A.

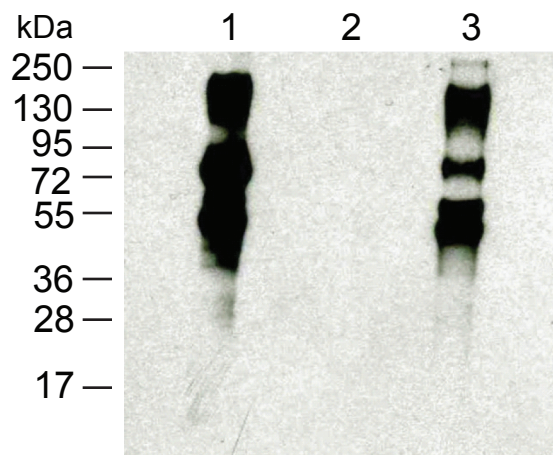

Streptavidin-HRP

B.

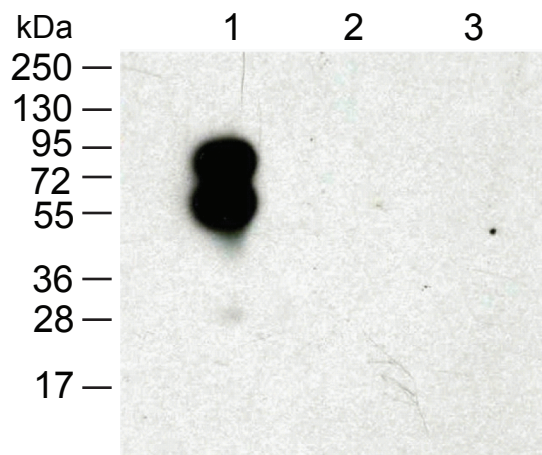

anti-PyCSP (Clone 2F6)

Supplement: supp_M112.024505_mcp.M112.024505-4.pdf [file supp_M112.024505_mcp.M112.024505-4.pdf]
